# Supplementary material for: Thermal Processing of Liquid Egg Yolks Modulates Physio-Chemical Properties of Mayonnaise
Source: MDPI journal article supplement (doi:10.3390/foods11101426), 2022-05-14
Supplement: s1 [file s1]

*Supplementary data*

# Thermal Processing of Liquid Egg Yolks Modulates Physio-Chemical Properties of Mayonnaise

Jou-Hsuan Ho <sup>1</sup>, Tan-Ang Lee <sup>1</sup>, Nobuaki Namai <sup>2</sup>, Shunji Sakai <sup>2</sup>, Siao-Syuan Lou <sup>1</sup>, Akihiro Handa <sup>3,†</sup> and Wan-Teng Lin <sup>4,\*,†</sup>

<sup>1</sup> Department of Food Science, Tunghai University, Taichung 40704, Taiwan; jhho@thu.edu.tw (J.-H.H.); danyanlee@gmail.com (T.-A.L.); cc5cc57788@gmail.com (S.-S.L.)

<sup>2</sup> R&D Division, Kewpie Corporation, Tokyo 182-0002, Japan; nobuaki\_namai@kewpie.co.jp (N.N.); shunji\_sakai@kewpie.co.jp (S.S.)

<sup>3</sup> Division of Life Science and Engineering, School of Science and Engineering, Tokyo Denki University, Saitama 350-0394, Japan; ahanda@mail.dendai.ac.jp

<sup>4</sup> Department of Hospitality Management, College of Agriculture, Tunghai University, Taichung 40704, Taiwan

\* Correspondence: 040770@thu.edu.tw; Tel.: +886-4-2359-0121 (ext. 37709)

† These authors contributed equally to this work.

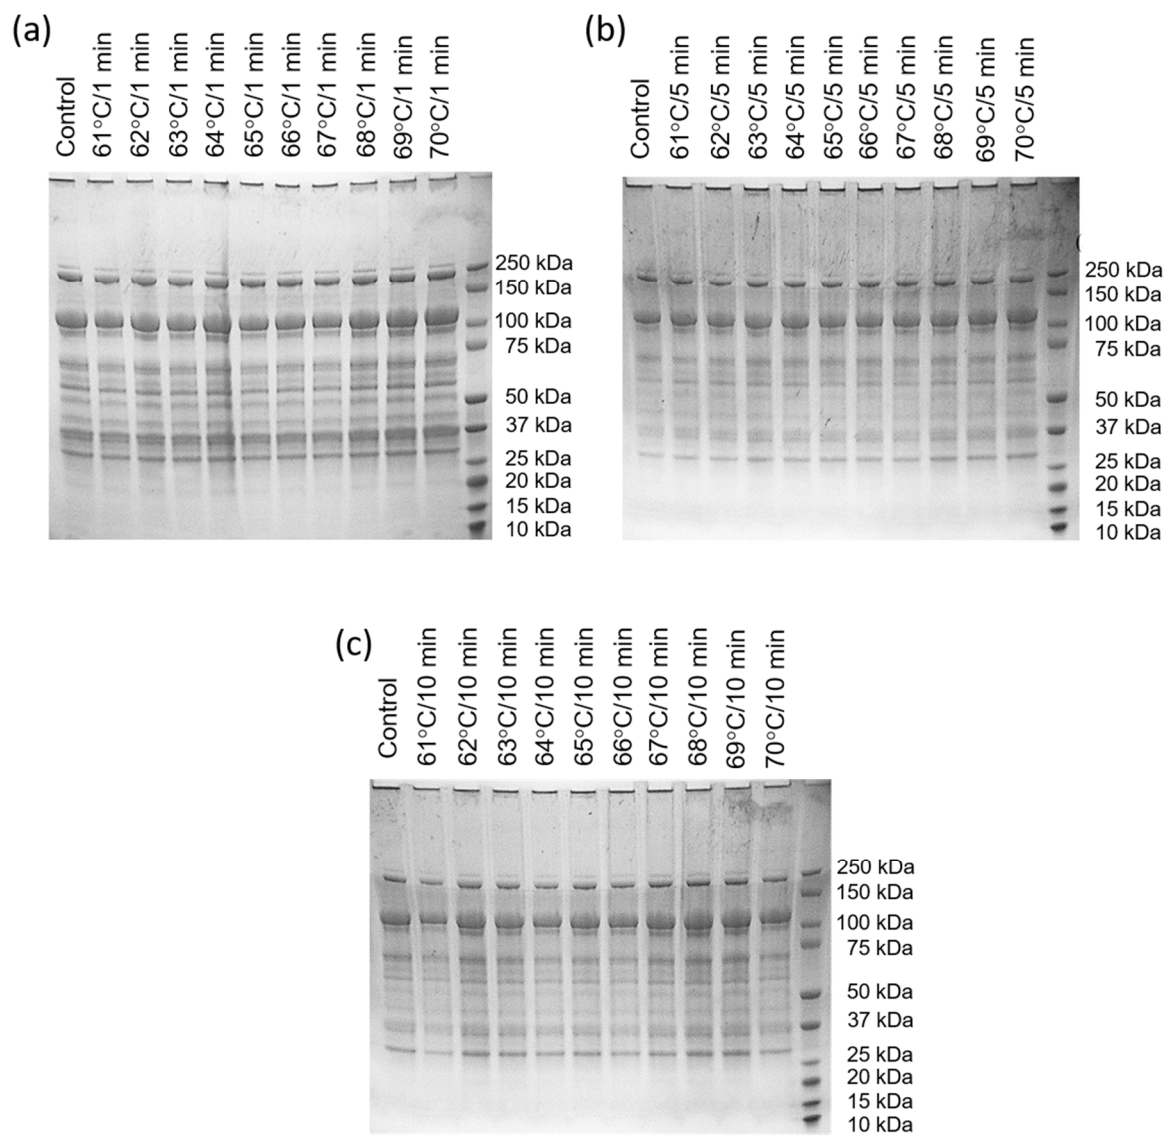

**Figure S1.** Effect of thermal processing on LEY protein denaturation determined by western blotting.

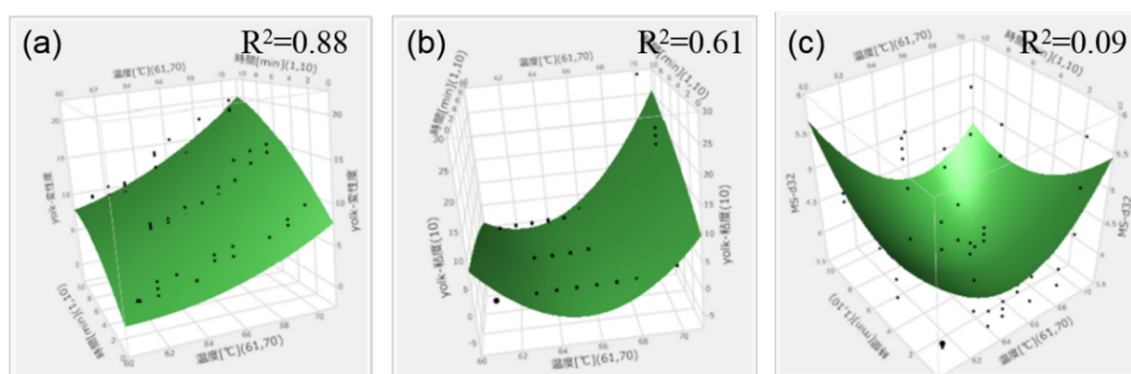

**Figure S2.** Response surface pattern analysis of LEY with different temperatures and times. (a) Degree of protein denaturation. (b) Viscosity. (c) Particle size.

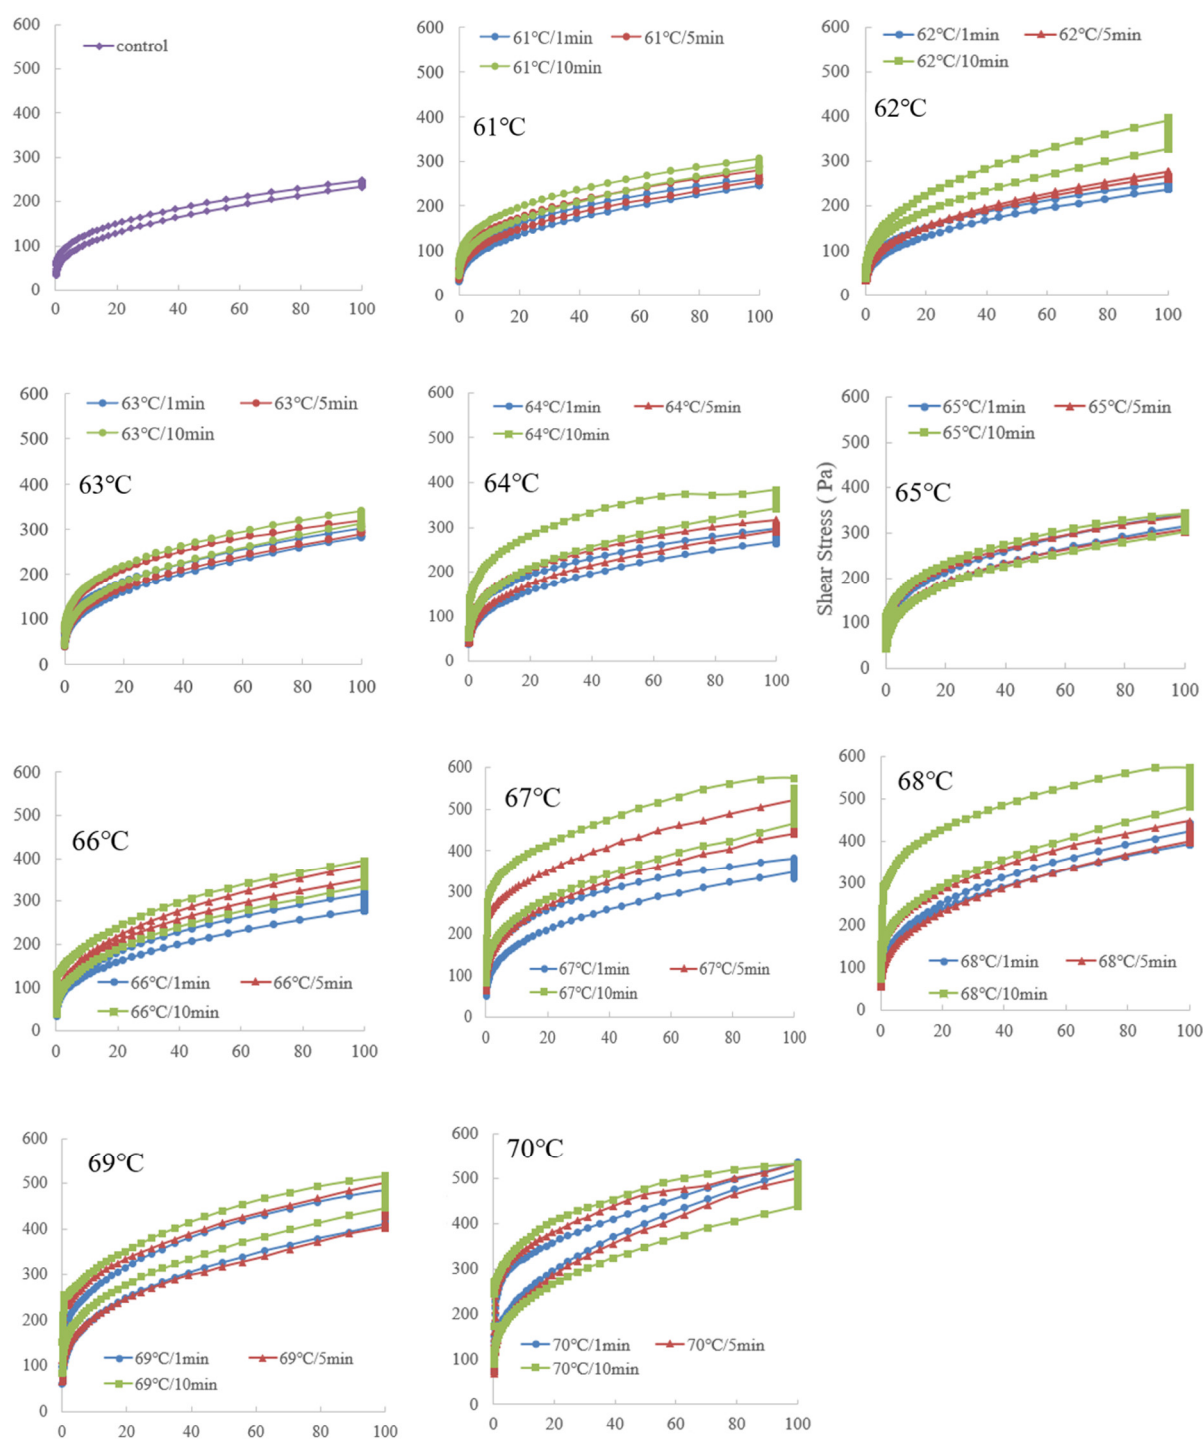

**Figure S3.** Effect of thermal processing on emulsion property of mayonnaise.

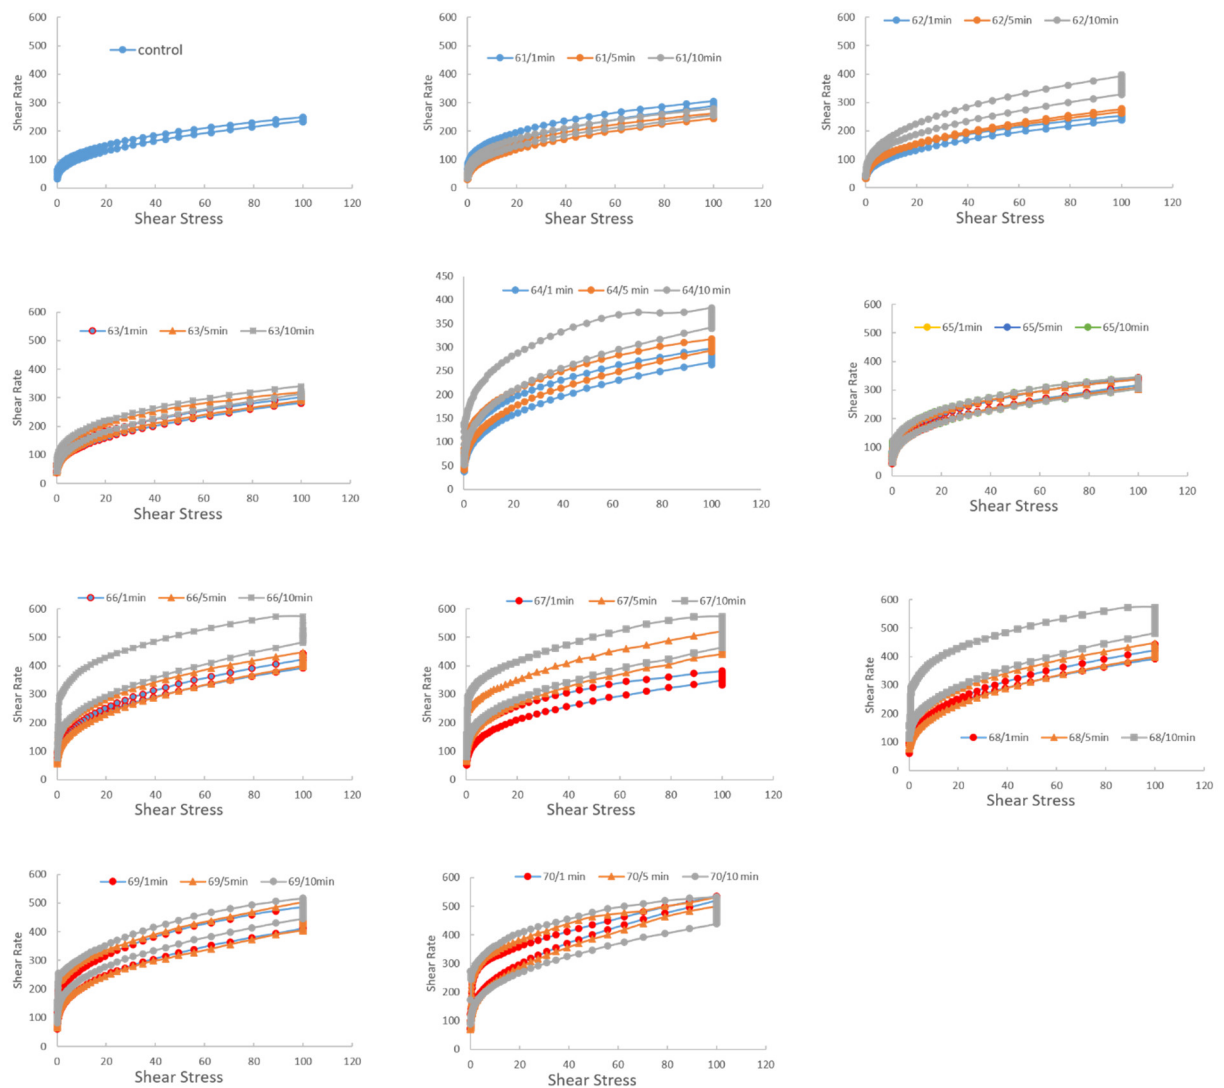

**Figure S4.** Effect of thermal processing on mayonnaise rheological properties.

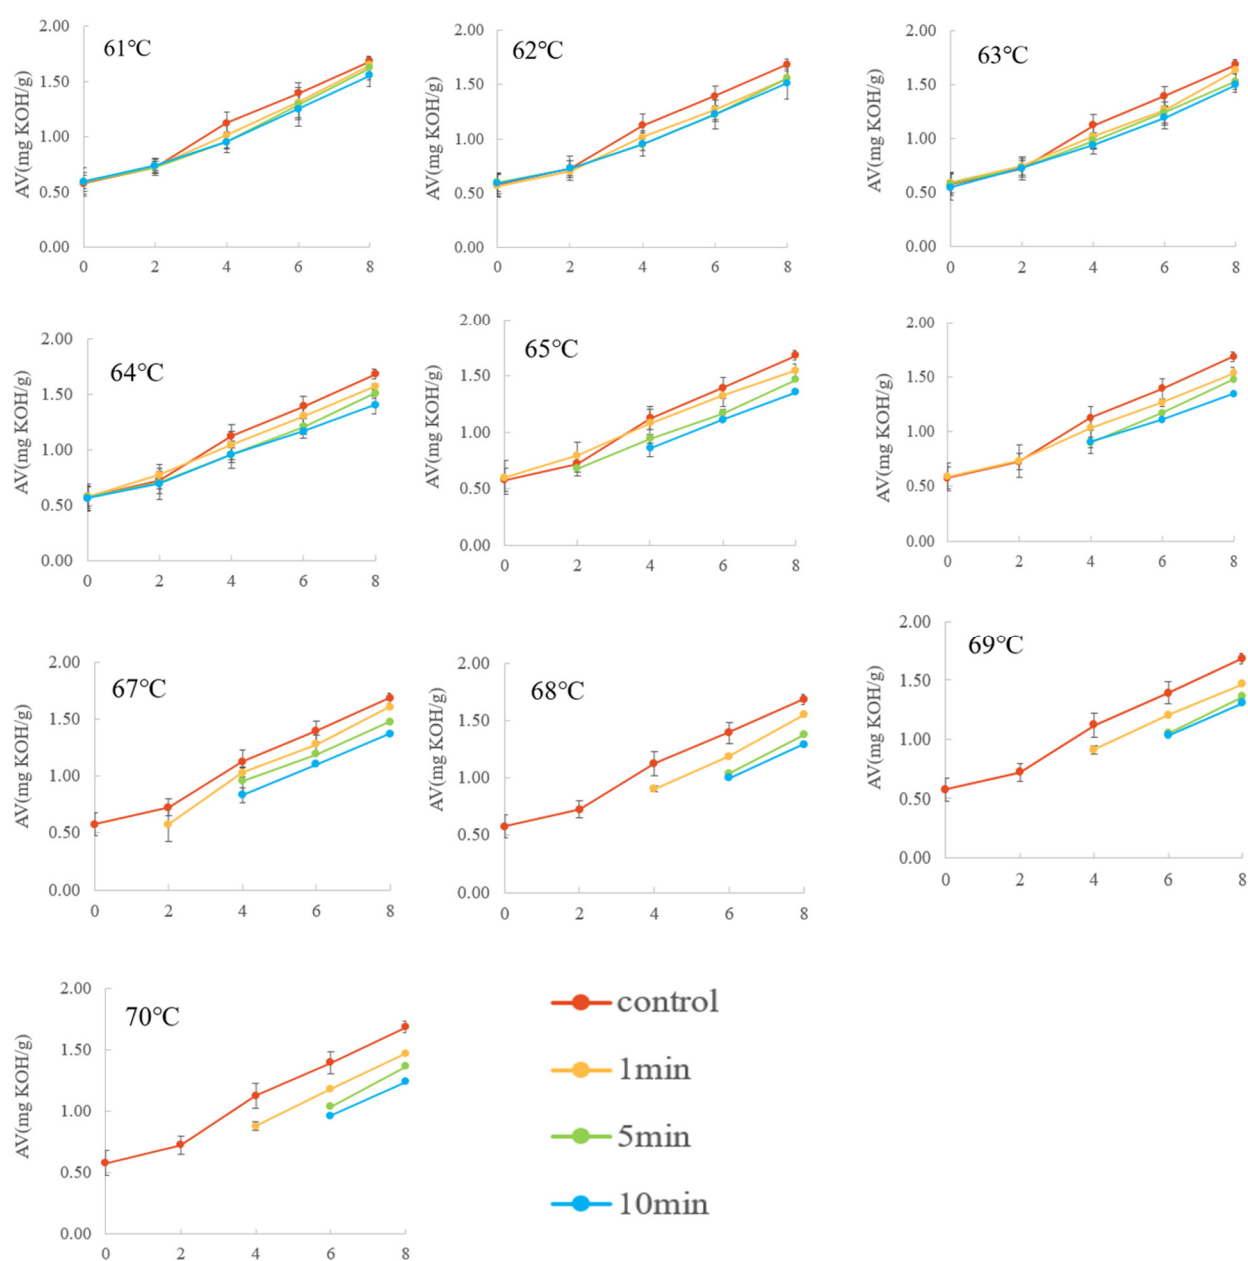

**Figure S5:** Effect of thermal processing on storage properties (acid values) of mayonnaise.

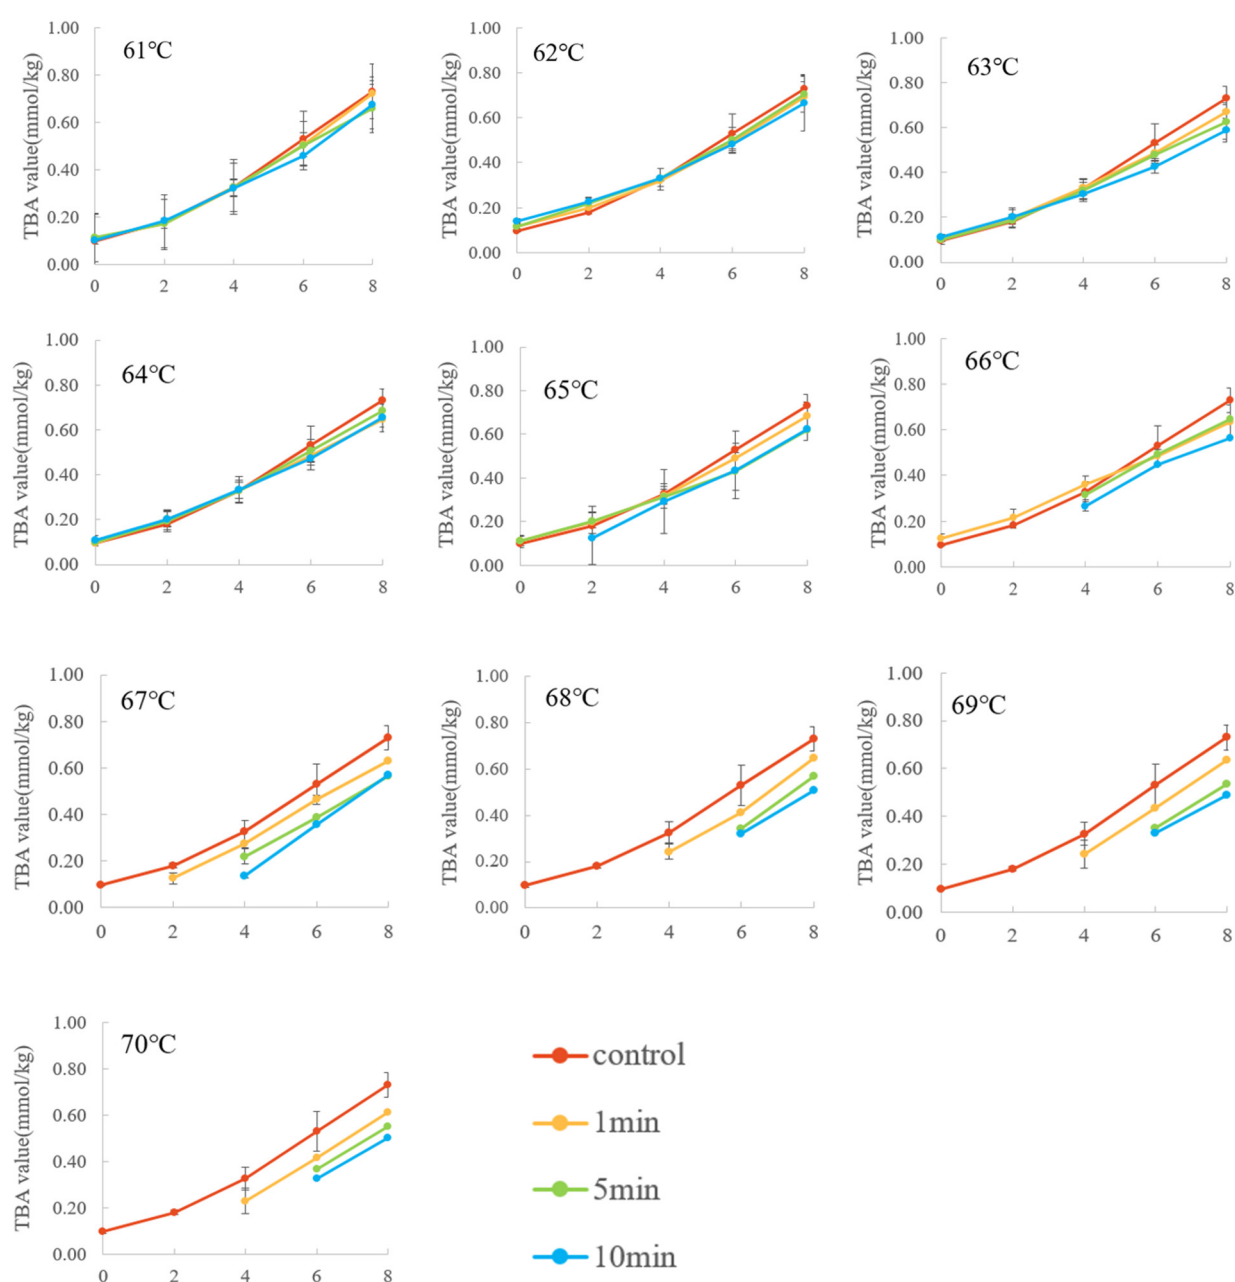

**Figure S6:** Effect of thermal processing on storage properties (TBA values) of mayonnaise.
